# Supplementary material for: Pain and satisfaction: the case of isolated COVID-19 patients of Pakistan
Source: PeerJ journal article supplement (doi:10.7717/peerj.11859), 2021-08-05
Supplement: questionnaire1.pdf [file questionnaire1.pdf]

## Questionnaire for COVID-19 patients

The questionnaire is designed to collect the psycho-social aspects of COVID-19 positive patients isolation in hospitals. The anonymity of patients will be assured.

1. Gender
  - Male
  - Female
  - Other
2. Marital status:
  - Unmarried / Never Married
  - Currently Married
  - Widow/widower
  - Divorced
3. Age (in years):
4. SPOUSE'S Age (in years):
5. Level of education (encircle the option)
  - 1-Primary
  - 2-Secondary
  - 3-High School
  - 4-College
  - 5-Graduate
  - 6-Post-graduate
- 5a. SPOUSE level of education:
  - 1-Primary
  - 2-Secondary
  - 3-High School
  - 4-College
  - 5-Graduate
  - 6-Post-graduate
6. Mother level of education (encircle the option)
  - 1-Primary
  - 2-Secondary
  - 3-High School
  - 4-College
  - 5-Graduate
  - 6-Post-graduate
- 6a. Father level of education:
  - 1-Primary
  - 2-Secondary
  - 3-High School
  - 4-College
  - 5-Graduate
  - 6-Post-graduate
7. Employment status:
  - 1-Full time
  - 2-part time
  - 3-Unemployed
  - 4-Full time student
  - 5-Retired
- 8a. Spouse's employment status:
  - 1-Full time
  - 2-part time
  - 3-Unemployed/Housewife
  - 4-Full time student
  - 5-Retired
8. Occupation:
9. SPOUSE'S occupation:.....
10. Household's size: \_\_\_\_\_
  - The number of dependants -Adults: .....
  - Children: .....
11. Adults or children for whom you are financially responsible for at least 50% of their support?

-No

-If YES, How many: .....

12. Do you currently own or rent your home:

- OWN
- RENT
- OTHER (.....)

13. Are you head of the house?

- Yes
- No

14. What is your income per month?

---

15. My total income is enough for me to meet my monthly living expenses.

- Strongly disagree
- Disagree
- Neutral
- Agree
- Strongly agree

16. What do you feel that your income is sufficient to meet your expenditures during this lockdown?

- 1-Not at all adequate
- 2-Can meet necessities only
- 3-Can afford some of the things
- 4-Can afford everything
- 5-Afford everything & still save money

17. Do you think that a relief package from the government could help you?

Yes    No    Don't want relief package

18. Overall, how satisfied are you with your life nowadays after pandemic?

- Very dissatisfied
- Dissatisfied
- Neither satisfied nor dissatisfied
- Satisfied
- Very satisfied

19. Overall, to what extent do you agree that the things you do in your life are worthwhile?

- Strongly disagree
- Disagree
- Neutral
- Agree
- Strongly agree

20. Overall, how happy did you feel about your life before pandemic?

- Not very happy
- Not happy
- Neutral

- Happy
- Very happy

21. Are you satisfied with your economic situation during this lockdown where you are suffering from the disease as well?

- Strongly disagree
- Disagree
- Neutral
- Agree
- Strongly agree

**Fear of COVID-19**

|    | Questions                                                                                        | Strongly agree | Agree | Neutral | Disagree | Strongly disagree |
|----|--------------------------------------------------------------------------------------------------|----------------|-------|---------|----------|-------------------|
| 22 | I am most afraid of coronavirus.                                                                 |                |       |         |          |                   |
| 23 | It makes me uncomfortable to think about coronavirus-19                                          |                |       |         |          |                   |
| 24 | My hands become clammy when I think about coronavirus-19                                         |                |       |         |          |                   |
| 25 | I am afraid of losing my life because of coronavirus-19                                          |                |       |         |          |                   |
| 26 | When watching news and stories about coronavirus-19 on social media, I become nervous or anxious |                |       |         |          |                   |
| 27 | My heart races or palpitates when I think that I have coronavirus-19                             |                |       |         |          |                   |
| 28 | Do you fear leaving the house?                                                                   |                |       |         |          |                   |

29. What is your pain level?

- No pain
- Mild
- Moderate
- Intense
- Unspeakable

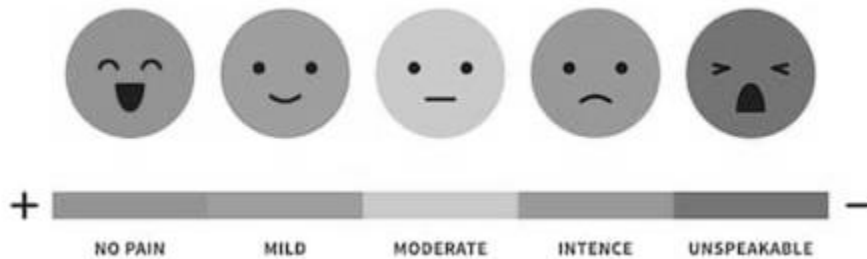

|    | <b>Questions</b>                                                                 | <b>Very dissatisfied</b> | <b>Dissatisfied</b> | <b>Neither dissatisfied nor satisfied</b> | <b>Satisfied</b> | <b>Very satisfied</b> |
|----|----------------------------------------------------------------------------------|--------------------------|---------------------|-------------------------------------------|------------------|-----------------------|
| 30 | Are you satisfied with the overall facilities in the isolation centre?           |                          |                     |                                           |                  |                       |
| 31 | Are you satisfied with the food facilities in the isolation centre?              |                          |                     |                                           |                  |                       |
| 32 | Are you satisfied with the timely provision of medicine in the isolation centre? |                          |                     |                                           |                  |                       |
| 33 | Are you satisfied with the behaviour of peer patients with you?                  |                          |                     |                                           |                  |                       |
| 34 | How much are you satisfied with the cleanliness of the isolation facility?       |                          |                     |                                           |                  |                       |
| 35 | How much are you satisfied with the behaviour of doctors?                        |                          |                     |                                           |                  |                       |
| 36 | How much are you satisfied with the behaviour of nurses?                         |                          |                     |                                           |                  |                       |

37. Do you think that you got corona due to your negligence in prevention?

- Strongly disagree
- Disagree
- Neutral
- Agree
- Strongly agree

**How much cost did you incur for the treatment of COVID-19 approximately?**

---
